# Supplementary material for: Preclinical Efficacy And Safety Evaluation of AAV‐OTOF in DFNB9 Mouse Model And Nonhuman Primate
Source: PubMed Central journal article supplement (PMC10797419; doi:10.1002/advs.202306201), 2023-11-28
Supplement: ADVS-11-2306201-s001.pdf [file ADVS-11-2306201-s001.pdf]

## Supporting Information

for *Adv. Sci.*, DOI 10.1002/adv.202306201

Preclinical Efficacy And Safety Evaluation of AAV-OTOF in DFNB9 Mouse Model And Nonhuman Primate

*Jieyu Qi\**, *Liyan Zhang*, *Fangzhi Tan\**, *Yang Zhang*, *Yinyi Zhou*, *Ziyu Zhang*, *Hongyang Wang*, *Chaorong Yu*, *Lulu Jiang*, *Jiancheng Liu*, *Tian Chen*, *Lianqiu Wu*, *Shanzhong Zhang*, *Sijie Sun*, *Shan Sun\**, *Ling Lu\**, *Qiuju Wang\** and *Renjie Chai\**

Supplementary materials for

**Pre-clinical efficacy and safety evaluation of AAV-*OTOF* in  
DFNB9 mouse model and non-human primate**

**This file included:**

Figure S1-S7

Table S1-S5

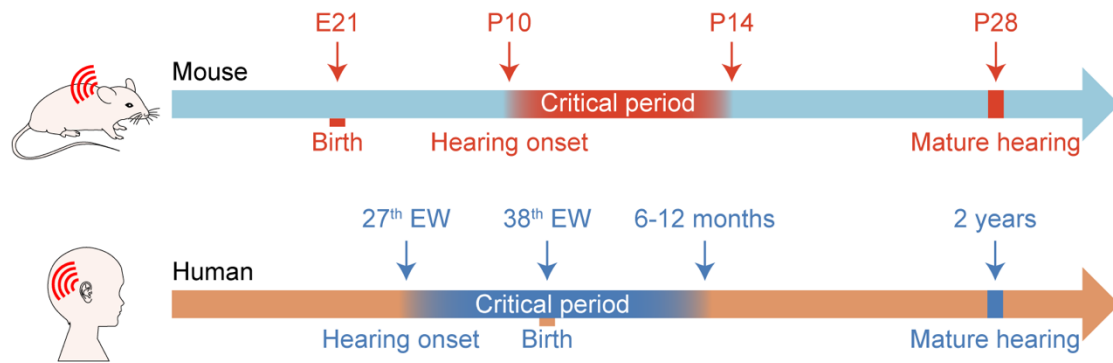

**Figure S1. The hearing development period in mouse and human.** In mice, hearing onset occurs around postnatal day 12 (P12). Whereas in humans, the development of inner ear is completed in utero, with hearing onset at embryonic week (EW) 27. Here, the injection time for studying the efficacy in mice was P30, corresponding to the age of human being 2 years after birth, indicating the treatment time window.

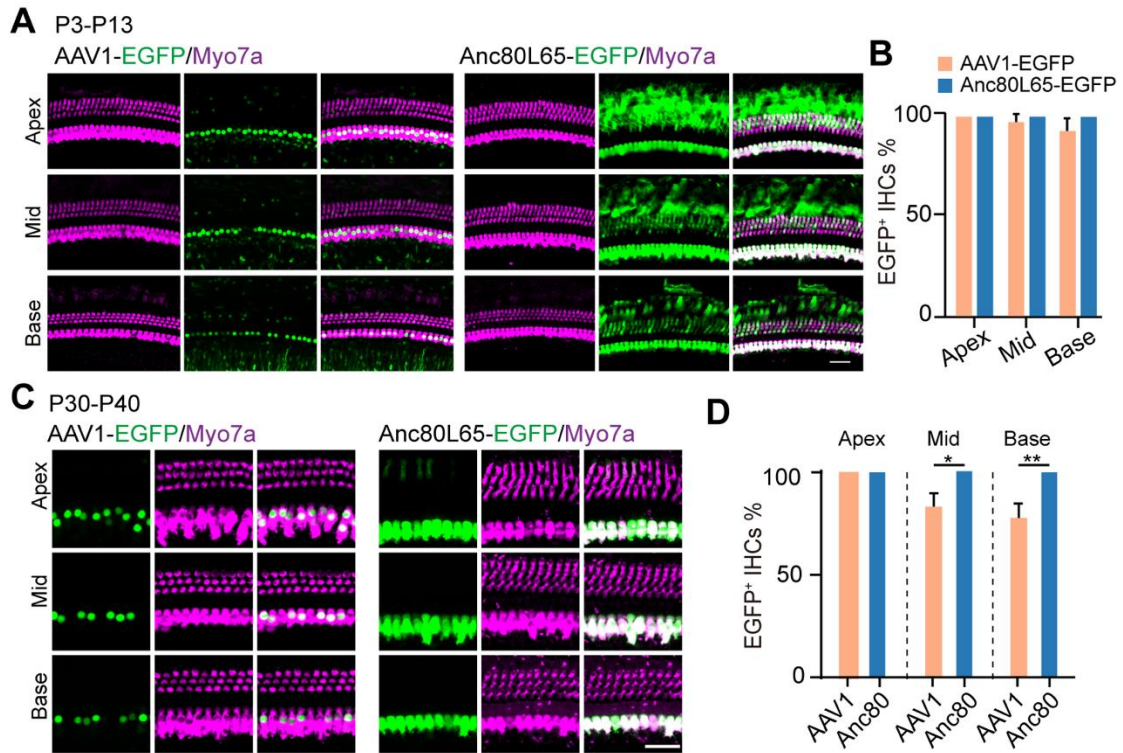

**Figure S2. *In vivo* transduction of Anc80 and AAV1 in neonatal and adult mice.** (A) Representative transduction in cochlea of C57 mice 10 days after delivery of Anc80 and AAV1 at P3 as indicated by the *EGFP* transgene (green). Scale bar, 50  $\mu$ m. (B) Percentage of EGFP-positive IHCs in (A). (C) Representative confocal images of cochleae of C57 mice 10 days after delivery of Anc80 and AAV1 at P30 as indicated by the *EGFP* transgene (green). Scale bar, 30  $\mu$ m. (D) Percentage of EGFP-positive IHCs in (C). Error bars indicated the standard deviation. The *p*-value was calculated by Student's *t*-test. \**p* < 0.05, \*\**p* < 0.01, n.s. means no significance difference.

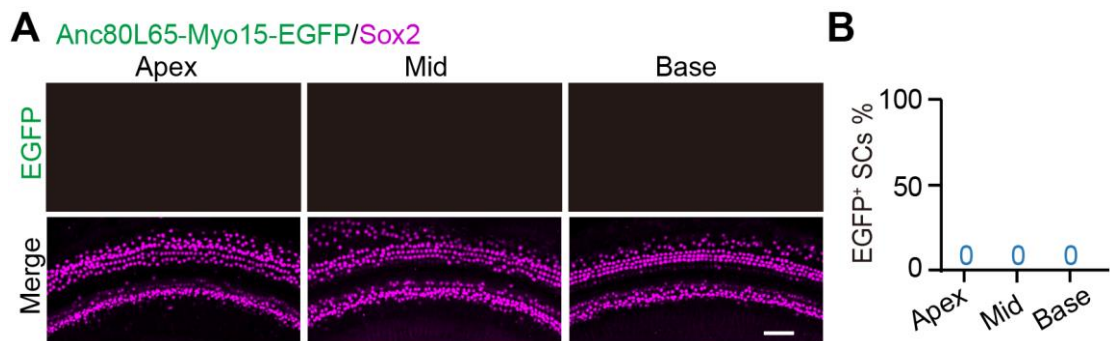

**Figure S3. The mMyo15 promoter does not drive EGFP expression in Sox2-positive supporting cells.** (A) Confocal images of cochleae of mice 10 days after delivery of Anc80-mMyo15-*EGFP* at P3. Scale bar, 50  $\mu$ m. (B) Percentage of EGFP-positive SCs.

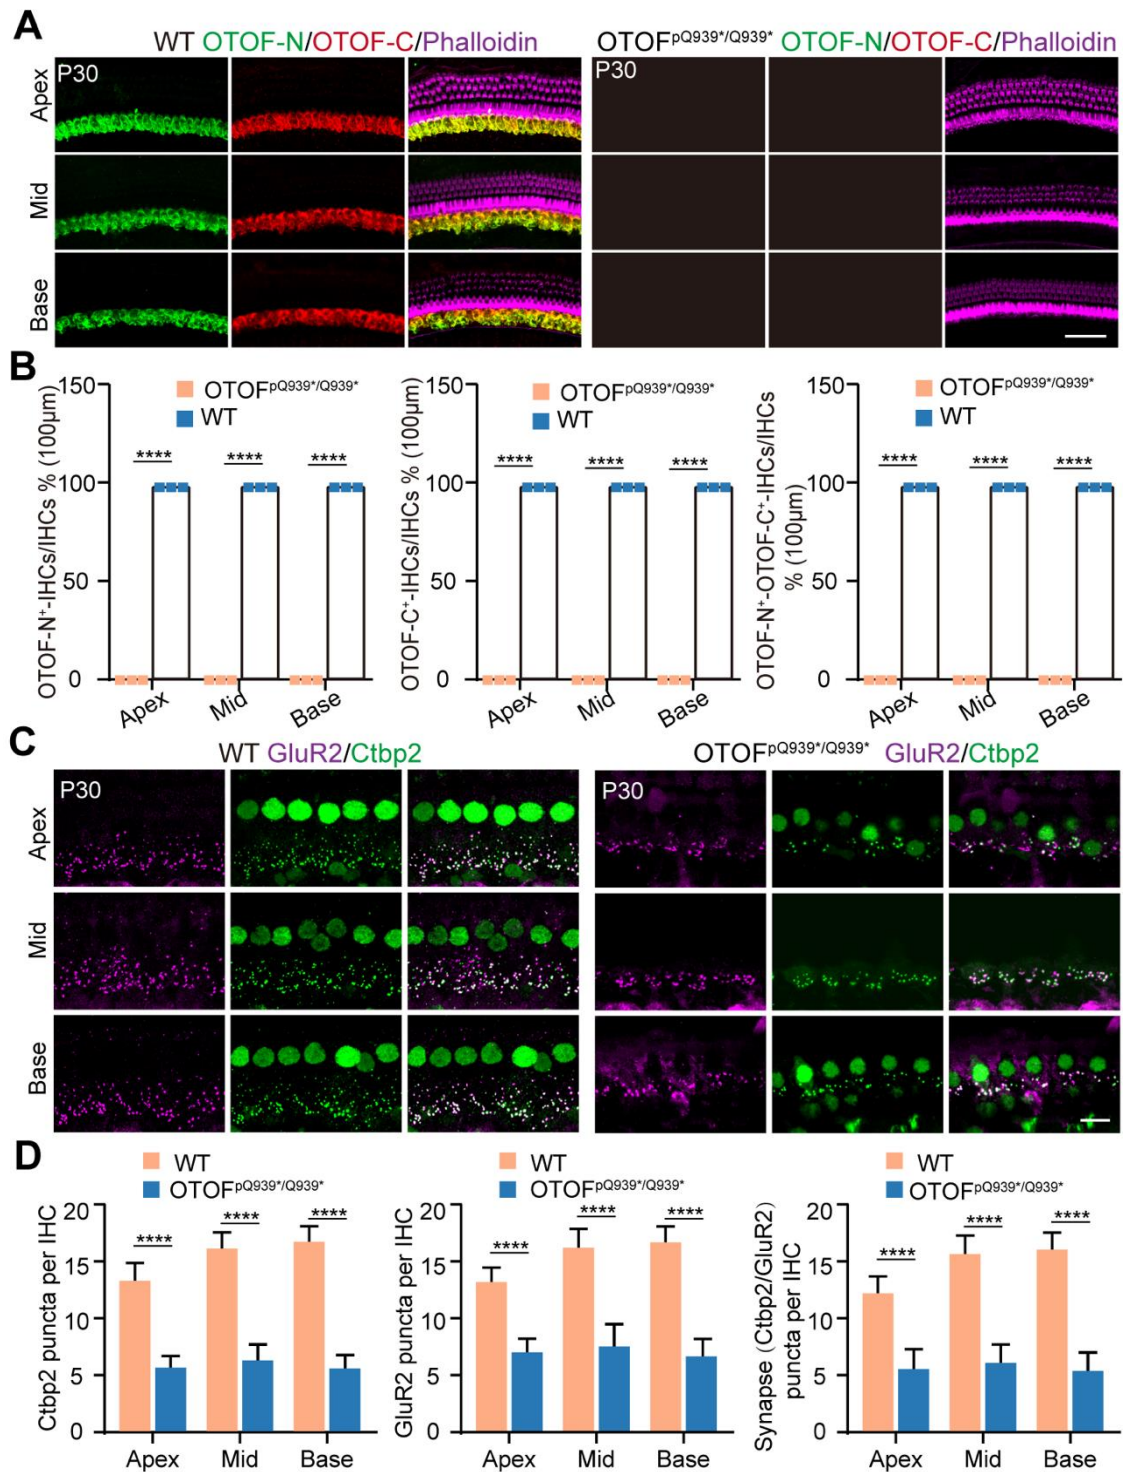

**Figure S4. Characterization of  $OTOF^{p.Q939^*/Q939^*}$  mice.** (A) Representative confocal images from P30 cochlear sections of WT and  $OTOF^{p.Q939^*/Q939^*}$  mice immunostained with OTOF-N (green), OTOF-C (red), and actin (magenta). Scale bar, 50  $\mu$ m. (B) The percentages of OTOF-N, OTOF-C, and double-positive IHCs. (C) Representative images of synapse ribbons analyzed by immunostaining. Magenta indicates the synaptic ribbons, and green indicates the GluR2 subunit of post-synaptic glutamate receptors. Scale bar: 1  $\mu$ m. (D) Quantification of the number of synaptic ribbons in

IHCs. Error bars indicated the standard errors of the mean. The  $p$ -value was calculated by Student's  $t$ -test. \*\*\*\* $p < 0.0001$ .

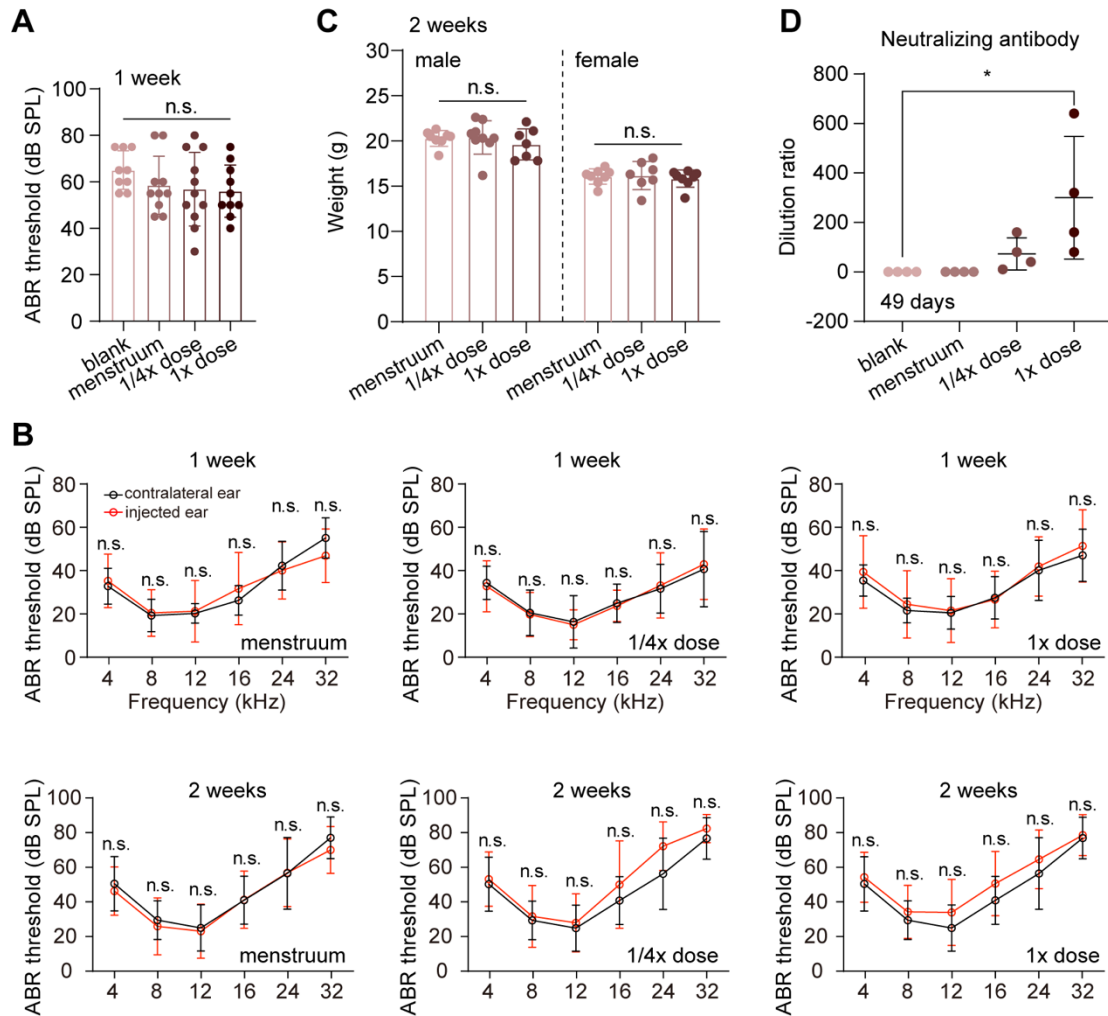

**Figure S5. Safety assessment of dual-Anc80L65-OTOF in wild-type mice for a short-term.** (A) Click ABR of adult wild-type mice and wild-type mice injected with menstruum, 1/4 dose, and 1× dose of AAV-OTOF 2 weeks later. (B) ABR of wild-type mice injected with menstruum and virus 2 weeks later. (C) The body weight of adult wild-type mice and wild-type mice injected with menstruum and virus. (D) The titers of neutralizing antibodies against AAV-OTOF 49 days post-surgery. Error bars indicated the standard deviation. The  $p$ -value was calculated by Student's  $t$ -test or one-way ANOVA. \* $p < 0.05$ , n.s. means no significance difference.



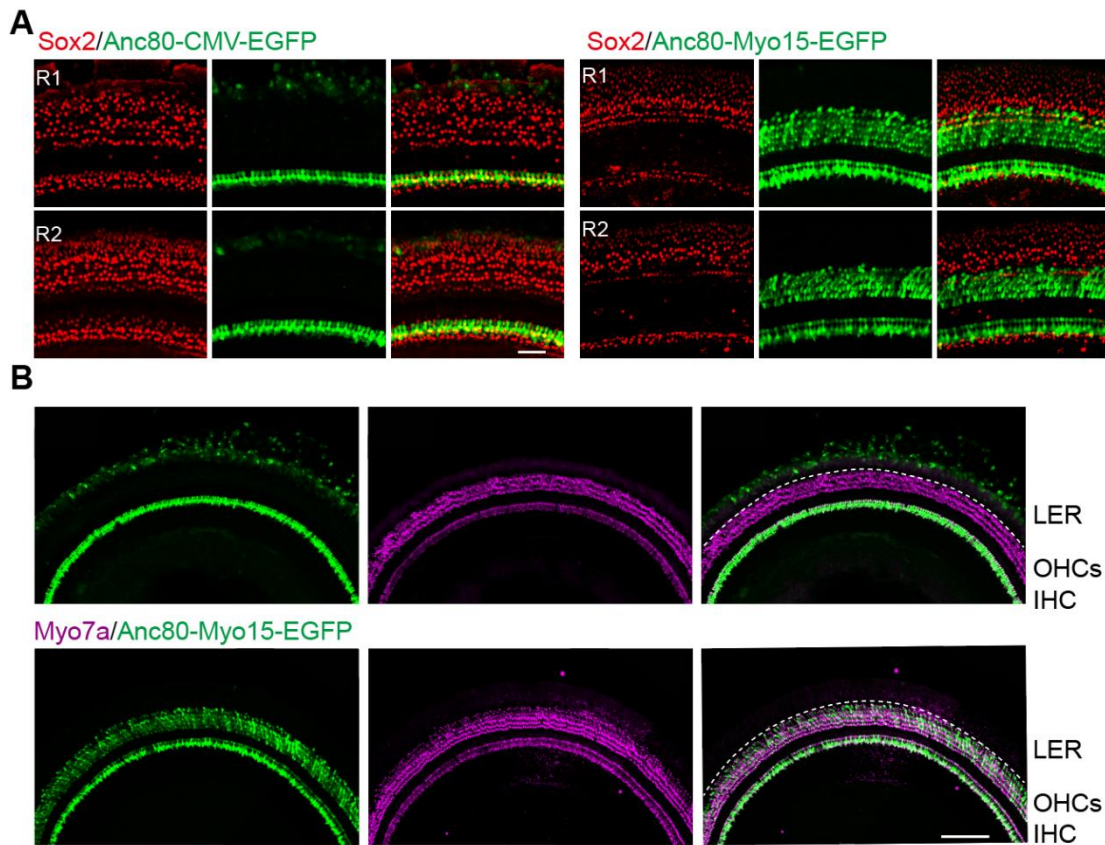

**Figure S6. Both the mMyo15 and CMV promoters drive EGFP expression in the cochlear epithelia in NHPs.** (A) Representative confocal images of cochlear supporting cells staining with Sox2 (red) and EGFP (green) transduced with Anc80L65-CMV-EGFP and Anc80L65-mMyo15-EGFP, respectively. Scale bar, 50  $\mu$ m. (B) Representative confocal images of cochlear epithelia staining for Myo7a (magenta) and EGFP (green) after transduction with Anc80L65-CMV-EGFP and Anc80L65-mMyo15-EGFP, respectively. Cells from the lesser epithelial ridge (LER) showed no EGFP signals driven by the mMyo15 promoter. Scale bar, 100  $\mu$ m.

OTOF-N/OTOF-C/Phalloidin/DAPI

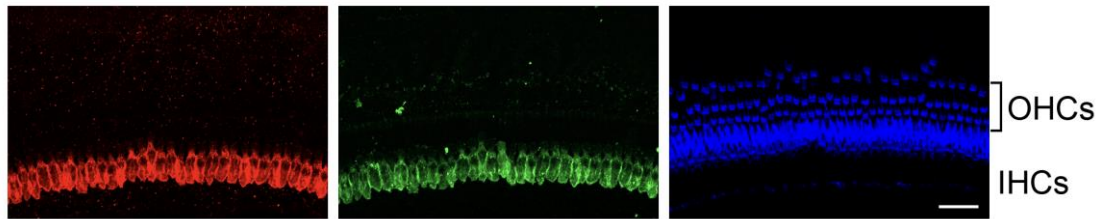

**Figure S7.** AAV-OTOF was not expressed in NHP OHCs driven by mMyo15 promoter. Representative confocal images of hair cells transduced with Anc80L65-mMyo15-*OTOF-N* and Anc80L65-*OTOF-C*. Z-stack images were captured and projected. Scale bar, 40  $\mu\text{m}$ .



**Table S1. The biodistribution of OTOF-N and OTOF-C in mouse tissues (9 days post AAV injection)**

| Sex    | Group      | Animal ID/tissue | The number of OTOF-N (copies/ $\mu$ g) |            |             |              |               |           |                      |          |          |          |          |
|--------|------------|------------------|----------------------------------------|------------|-------------|--------------|---------------|-----------|----------------------|----------|----------|----------|----------|
|        |            |                  | Whole blood                            | Left brain | Right brain | Left cochlea | Right cochlea | Brainstem | Cervical lymph nodes | Heart    | Kidney   | Liver    | Lung     |
| male   | 1/4 x dose | 1-1-1            | 3.48E+02                               | 5.02E+02   | 5.73E+01    | 6.62E+04     | BQL           | 5.90E+01  | 1.27E+03             | BQL      | BQL      | 1.82E+04 | 5.20E+01 |
|        |            | 1-1-2            | 4.48E+02                               | 1.24E+03   | 2.39E+02    | 1.75E+04     | 1.77E+02      | 3.32E+03  | 2.27E+03             | BQL      | 5.33E+01 | 3.63E+04 | 1.17E+02 |
|        | 1 x dose   | 2-1-1            | 1.98E+02                               | 3.16E+02   | BQL         | 1.10E+04     | BQL           | 4.88E+02  | 4.42E+02             | BQL      | 4.58E+01 | 8.54E+03 | BQL      |
|        |            | 2-1-2            | 7.47E+02                               | 4.64E+02   | 3.75E+01    | 4.34E+03     | BQL           | 6.69E+01  | 6.51E+02             | BQL      | BQL      | 9.02E+03 | BQL      |
| female | 1/4 x dose | 1-2-1            | BQL                                    | BQL        | BQL         | 1.31E+04     | 4.70E+01      | 9.66E+01  | 1.59E+03             | BQL      | BQL      | 1.71E+03 | BQL      |
|        |            | 1-2-2            | 1.24E+03                               | 4.05E+02   | 4.26E+02    | 7.22E+04     | 1.14E+03      | 1.45E+03  | 1.02E+03             | 2.18E+02 | 1.31E+02 | 8.26E+04 | 7.97E+01 |
|        | 1 x dose   | 2-2-1            | 2.78E+03                               | 1.10E+03   | 2.16E+02    | 5.23E+04     | 2.55E+03      | 1.06E+04  | 1.34E+04             | 1.10E+03 | 3.14E+02 | 4.80E+05 | 1.56E+02 |
|        |            | 2-2-2            | 3.57E+03                               | 6.13E+03   | 4.80E+03    | 5.88E+04     | 2.37E+04      | 5.43E+04  | 8.97E+03             | 9.37E+02 | 6.52E+02 | 3.31E+05 | 3.69E+02 |

| Sex    | Group      | Animal ID/tissue | The number of OTOF-C (copies/ $\mu$ g) |            |             |              |               |           |                      |          |          |          |          |
|--------|------------|------------------|----------------------------------------|------------|-------------|--------------|---------------|-----------|----------------------|----------|----------|----------|----------|
|        |            |                  | Whole blood                            | Left brain | Right brain | Left cochlea | Right cochlea | Brainstem | Cervical lymph nodes | Heart    | Kidney   | Liver    | Lung     |
| male   | 1/4 x dose | 1-1-1            | 6.05E+02                               | 6.10E+02   | 7.18E+01    | 6.38E+04     | BQL           | 7.01E+01  | 9.26E+02             | 9.12E+01 | 5.09E+01 | 1.59E+04 | 7.00E+01 |
|        |            | 1-1-2            | 5.84E+02                               | 9.54E+02   | 1.89E+02    | 1.52E+04     | 1.51E+02      | 2.98E+03  | 7.88E+02             | BQL      | 6.19E+01 | 2.60E+04 | 8.72E+01 |
|        | 1 x dose   | 2-1-1            | 2.91E+02                               | 4.05E+02   | BQL         | 1.21E+04     | BQL           | 6.69E+02  | 2.48E+02             | BQL      | 7.49E+01 | 7.82E+03 | BQL      |
|        |            | 2-1-2            | 1.33E+03                               | 5.60E+02   | 4.99E+01    | 4.11E+03     | BQL           | 9.20E+01  | 5.83E+02             | 6.73E+01 | 3.41E+01 | 9.79E+03 | 4.07E+01 |
| female | 1/4 x dose | 1-2-1            | BQL                                    | BQL        | BQL         | 1.65E+04     | 5.28E+01      | 1.33E+02  | 2.21E+03             | BQL      | BQL      | 2.13E+03 | BQL      |
|        |            | 1-2-2            | 2.39E+03                               | 4.95E+02   | 4.76E+02    | 6.18E+04     | 8.91E+02      | 1.74E+03  | 7.65E+02             | 3.49E+02 | 1.66E+02 | 5.85E+04 | 1.29E+02 |
|        | 1 x dose   | 2-2-1            | 4.98E+03                               | 1.32E+03   | 1.96E+02    | 5.20E+04     | 2.68E+03      | 1.26E+04  | 8.55E+03             | 1.61E+03 | 3.82E+02 | 3.97E+05 | 1.88E+02 |
|        |            | 2-2-2            | 5.97E+03                               | 7.84E+03   | 4.94E+03    | 7.20E+04     | 2.47E+04      | 5.31E+04  | 5.82E+03             | 1.31E+03 | 8.54E+02 | 2.96E+05 | 4.30E+02 |

Note: BQL indicates that it is lower than the lower limit of quantification. Tissue samples are measured in copies/ $\mu$ g, representing the number of copies of the target gene contained in the DNA sample per  $\mu$ g after extraction.

**Table S2. Blood biochemistry in mice (9 days post AAV injection)**

|                                            | Blank | Menstruum | 1/4 x dose | 1 x dose |
|--------------------------------------------|-------|-----------|------------|----------|
| Alanine<br>aminotransferase<br>(U/L)       | 24    | 24        | 24         | 28       |
|                                            | 32    | 24        | 34         | 26       |
|                                            | 22    | 28        | 24         | 22       |
|                                            | 22    | 22        | 38         | 28       |
| Aspartate aminotran<br>sferase (U/L)       | 46    | 52        | 50         | 52       |
|                                            | 94    | 46        | 64         | 48       |
|                                            | 64    | 56        | 50         | 60       |
|                                            | 50    | 58        | 86         | 68       |
| Total protein (g/L)                        | 55.2  | 53.4      | 55         | 51.8     |
|                                            | 56.6  | 53.4      | 54.4       | 54       |
|                                            | 53.8  | 55.8      | 51.6       | 52.8     |
|                                            | 50.8  | 56.6      | 56.2       | 51.2     |
| Albumin (g/L)                              | 26.4  | 25.8      | 24.2       | 24.2     |
|                                            | 25.4  | 25.2      | 23         | 25.6     |
|                                            | 26.8  | 27.2      | 25.8       | 26.6     |
|                                            | 26    | 27.6      | 23.2       | 26       |
| Alkaline<br>phosphatase (U/L)              | 74    | 80        | 70         | 84       |
|                                            | 78    | 82        | 128        | 110      |
|                                            | 106   | 124       | 122        | 110      |
|                                            | 98    | 116       | 176        | 108      |
| Glucose (mm/L)                             | 15.42 | 11.38     | 12.48      | 8.8      |
|                                            | 12.92 | 10.52     | 12.16      | 13.54    |
|                                            | 7.78  | 11.76     | 11.42      | 6.2      |
|                                            | 14.44 | 8.86      | 7.04       | 6.76     |
| Urea (mm/L)                                | 7.6   | 9.4       | 8.4        | 10       |
|                                            | 8.8   | 10.6      | 7.2        | 9.2      |
|                                            | 8.2   | 8.2       | 9.4        | 8.4      |
|                                            | 7.6   | 9.6       | 10.4       | 10.2     |
| Creatine kinase<br>(U/L)                   | 86    | 302       | 90         | 134      |
|                                            | 224   | 100       | 178        | 80       |
|                                            | 144   | 124       | 216        | 104      |
|                                            | 116   | 262       | 252        | 156      |
| Total<br>bilirubin( $\mu$ m/L)             | 1.68  | 2.3       | 1.96       | 2.04     |
|                                            | 2.46  | 1.94      | 1.86       | 1.76     |
|                                            | 1.54  | 2.12      | 2.8        | 1.36     |
|                                            | 1.26  | 1.8       | 1.18       | 1.22     |
| Gamma-<br>glutamyltranspept<br>idase (U/L) | 0     | 0         | 0          | 0        |
|                                            | 0     | 0         | 0          | 0        |
|                                            | 0     | 0         | 0          | 0        |
|                                            | 0     | 0         | 0          | 0        |
| Lactic<br>dehydrogenase<br>(U/L)           | 276   | 330       | 408        | 344      |
|                                            | 374   | 308       | 404        | 256      |
|                                            | 316   | 362       | 264        | 264      |
|                                            | 306   | 316       | 464        | 268      |
| Total cholesterol                          | 2.84  | 2.44      | 2.3        | 2.76     |
|                                            | 3.06  | 2.48      | 2.58       | 2.7      |

|                                    |       |       |       |       |
|------------------------------------|-------|-------|-------|-------|
| (mm/L)                             | 2.18  | 2.12  | 2     | 2.14  |
|                                    | 2.16  | 2.08  | 2.22  | 2.18  |
| Triglyceride (mm/L)                | 0.56  | 0.58  | 0.6   | 0.7   |
|                                    | 0.7   | 0.8   | 0.7   | 0.52  |
|                                    | 0.6   | 0.62  | 0.72  | 0.58  |
|                                    | 0.62  | 0.52  | 0.72  | 0.54  |
| Calcium (mm/L)                     | 3.38  | 3.66  | 3.78  | 3.48  |
|                                    | 3.46  | 3.34  | 3.34  | 3.42  |
|                                    | 3.44  | 3.28  | 3.16  | 3.66  |
|                                    | 3.4   | 3.58  | 2.96  | 3.48  |
| Phosphorus (mm/L)                  | 2.34  | 2.26  | 1.94  | 2.34  |
|                                    | 2.32  | 2.38  | 2.08  | 2.16  |
|                                    | 2.52  | 2.4   | 2.56  | 2.38  |
|                                    | 2.74  | 2.34  | 2.28  | 2.3   |
| Albumin/globulin                   | 0.9   | 0.9   | 0.8   | 0.9   |
|                                    | 0.8   | 0.9   | 0.7   | 0.9   |
|                                    | 1     | 1     | 1     | 1     |
|                                    | 1     | 1     | 0.7   | 1     |
| Creatinine( $\mu$ m/L)             | 12    | 12    | 8     | 12    |
|                                    | 12    | 10    | 12    | 8     |
|                                    | 14    | 10    | 12    | 10    |
|                                    | 16    | 14    | 12    | 10    |
| Sodium concentration (mm/L)        | 140.8 | 144.2 | 144.4 | 143   |
|                                    | 144.8 | 145.4 | 143.6 | 145.2 |
|                                    | 145.8 | 143.8 | 141.8 | 145.6 |
|                                    | 143.6 | 142.4 | 142.8 | 144.6 |
| Potassium ion concentration (mm/L) | 4.66  | 5.62  | 5.56  | 5.5   |
|                                    | 5.44  | 5.68  | 5.5   | 5.1   |
|                                    | 5.08  | 5.32  | 5.02  | 5.52  |
|                                    | 4.84  | 5.84  | 5.44  | 5.1   |
| Chloride ion concentration (mm/L)  | 104.2 | 107.8 | 107.2 | 108.6 |
|                                    | 107.6 | 109.2 | 106.4 | 109   |
|                                    | 112   | 109   | 108.4 | 111.8 |
|                                    | 109   | 109.6 | 110.6 | 111.6 |

**Table S3. Blood cell biochemistry in mice (9 days post AAV injection)**

|                                                  | Blank | Menstruum | 1/4 x dose | 1 x dose |
|--------------------------------------------------|-------|-----------|------------|----------|
| White blood cells (×9/L)                         | 4.31  | 3.07      | 2.78       | 5.97     |
|                                                  | 3.9   | 4.58      | 4.15       | 3.85     |
|                                                  | 2.1   | 3.47      | 4.78       | 2.59     |
|                                                  | 2.77  | 3.65      | 3.34       | 5.04     |
| Red blood cells (×12/L)                          | 10.72 | 10.96     | 10.14      | 10.48    |
|                                                  | 8.87  | 10.69     | 10.48      | 10.76    |
|                                                  | 10.72 | 10.2      | 9.99       | 10.39    |
|                                                  | 10.65 | 10.65     | 11.13      | 10.71    |
| Hemoglobin (×g/L)                                | 152   | 156       | 144        | 144      |
|                                                  | 128   | 153       | 145        | 149      |
|                                                  | 151   | 145       | 130        | 150      |
|                                                  | 153   | 149       | 161        | 153      |
| Red blood cell specific volume (%)               | 48.7  | 49.2      | 45         | 44.9     |
|                                                  | 40    | 47.5      | 46.1       | 47.2     |
|                                                  | 47.4  | 45.6      | 42.1       | 46.1     |
|                                                  | 47.2  | 47        | 49.9       | 47.6     |
| Mean corpuscular volume (×pg)                    | 45.4  | 44.9      | 44.4       | 42.8     |
|                                                  | 45.1  | 44.4      | 44         | 43.9     |
|                                                  | 44.2  | 44.7      | 42.1       | 44.4     |
|                                                  | 44.3  | 44.1      | 44.8       | 44.4     |
| Mean erythrocyte hemoglobin (×pg)                | 14.2  | 14.2      | 14.2       | 13.7     |
|                                                  | 14.4  | 14.3      | 13.8       | 13.8     |
|                                                  | 14.1  | 14.2      | 13         | 14.4     |
|                                                  | 14.4  | 14        | 14.5       | 14.3     |
| Mean erythrocyte hemoglobin concentration (×g/L) | 312   | 317       | 320        | 321      |
|                                                  | 320   | 322       | 315        | 316      |
|                                                  | 319   | 318       | 309        | 325      |
|                                                  | 324   | 317       | 323        | 321      |
| Platelet count (×9/L)                            | 1331  | 1250      | 1290       | 1551     |
|                                                  | 1111  | 1177      | 1344       | 1378     |
|                                                  | 1235  | 1164      | 1619       | 1140     |
|                                                  | 1285  | 1300      | 1321       | 1325     |
| Lymphocyte (%)                                   | 87.9  | 82.4      | 83.5       | 72.2     |
|                                                  | 85.4  | 82.1      | 85.1       | 83.4     |
|                                                  | 84.3  | 72        | 72.6       | 87.6     |
|                                                  | 82.3  | 83.6      | 80.5       | 76.6     |
| Monocyte (%)                                     | 2.1   | 2.3       | 1.8        | 2.2      |
|                                                  | 2.1   | 3.9       | 1.7        | 1.3      |
|                                                  | 1.9   | 2.6       | 4.4        | 2.3      |
|                                                  | 1.8   | 2.5       | 2.1        | 1.8      |
| Neutrophils (%)                                  | 9.1   | 13.3      | 12.9       | 24.6     |
|                                                  | 12    | 10.5      | 12         | 15       |
|                                                  | 13.3  | 24.5      | 22         | 9.7      |
|                                                  | 14.5  | 12.5      | 14.4       | 21       |
| Eosinophils (%)                                  | 0.7   | 2         | 1.8        | 1        |
|                                                  | 0.5   | 3.5       | 1.2        | 0.3      |

|                                                 |        |        |        |        |
|-------------------------------------------------|--------|--------|--------|--------|
| Eosinophils (%)                                 | 0.5    | 0.6    | 0.8    | 0.4    |
|                                                 | 1.4    | 1.4    | 3      | 0.6    |
| Basophils (%)                                   | 0.2    | 0      | 0      | 0      |
|                                                 | 0      | 0      | 0      | 0      |
|                                                 | 0      | 0.3    | 0.2    | 0      |
|                                                 | 0      | 0      | 0      | 0      |
| Lymphocyte (absolute value) ( $\times 9/L$ )    | 3.79   | 2.53   | 2.32   | 4.31   |
|                                                 | 3.33   | 3.76   | 3.53   | 3.21   |
|                                                 | 1.77   | 2.5    | 3.47   | 2.27   |
|                                                 | 2.28   | 3.05   | 2.69   | 3.86   |
| Monocyte (absolute value) ( $\times 9/L$ )      | 0.09   | 0.07   | 0.05   | 0.13   |
|                                                 | 0.08   | 0.18   | 0.07   | 0.05   |
|                                                 | 0.04   | 0.09   | 0.21   | 0.06   |
|                                                 | 0.05   | 0.09   | 0.07   | 0.09   |
| Neutrophils (absolute value) ( $\times 9/L$ )   | 0.39   | 0.41   | 0.36   | 1.47   |
|                                                 | 0.47   | 0.48   | 0.5    | 0.58   |
|                                                 | 0.28   | 0.85   | 1.05   | 0.25   |
|                                                 | 0.4    | 0.46   | 0.48   | 1.06   |
| Eosinophils (absolute value) ( $\times 9/L$ )   | 0.03   | 0.06   | 0.05   | 0.06   |
|                                                 | 0.02   | 0.16   | 0.05   | 0.01   |
|                                                 | 0.01   | 0.02   | 0.04   | 0.01   |
|                                                 | 0.04   | 0.05   | 0.1    | 0.03   |
| Basophils (absolute value) ( $\times 9/L$ )     | 0.01   | 0      | 0      | 0      |
|                                                 | 0      | 0      | 0      | 0      |
|                                                 | 0      | 0.01   | 0.01   | 0      |
|                                                 | 0      | 0      | 0      | 0      |
| RDW-CV (%)                                      | 19.4   | 18.6   | 19     | 19.8   |
|                                                 | 17.6   | 18.9   | 19.1   | 19.1   |
|                                                 | 19.4   | 19.9   | 21     | 18.2   |
|                                                 | 19.7   | 19.4   | 19.2   | 19.2   |
| RDW-SD (%)                                      | 24.7   | 22.2   | 23.8   | 24.1   |
|                                                 | 24.1   | 23     | 23.1   | 22.1   |
|                                                 | 22.9   | 25.7   | 26.9   | 22.1   |
|                                                 | 24     | 23.5   | 22.7   | 23.8   |
| Platelet distribution width (fL)                | 6.3    | 6.1    | 6.1    | 6.2    |
|                                                 | 6      | 6      | 6.2    | 6.2    |
|                                                 | 6.2    | 6.2    | 6.2    | 6.4    |
|                                                 | 6.2    | 6.3    | 6.4    | 6.2    |
| Mean platelet volume (fL)                       | 5.9    | 5.9    | 5.9    | 6.1    |
|                                                 | 6.1    | 5.8    | 6.1    | 6      |
|                                                 | 6      | 6.1    | 6.3    | 6.1    |
|                                                 | 5.9    | 5.9    | 6      | 6.1    |
| Reticulocyte count (%)                          | 4.42   | 3.7    | 3.78   | 4.51   |
|                                                 | 4.57   | 3.83   | 3.77   | 4.64   |
|                                                 | 4.33   | 3.18   | 5.38   | 3.03   |
|                                                 | 4.16   | 3.58   | 3.66   | 3.97   |
| Reticulocyte (absolute value) ( $\times 12/L$ ) | 0.4738 | 0.4055 | 0.3833 | 0.4726 |
|                                                 | 0.4054 | 0.4094 | 0.3951 | 0.4993 |
|                                                 | 0.4642 | 0.3244 | 0.5375 | 0.3148 |

|                                                            |       |        |        |        |
|------------------------------------------------------------|-------|--------|--------|--------|
|                                                            | 0.443 | 0.3813 | 0.4074 | 0.4252 |
| Platelet accumulation (%)                                  | 0.79  | 0.74   | 0.77   | 0.94   |
|                                                            | 0.68  | 0.68   | 0.81   | 0.83   |
|                                                            | 0.74  | 0.71   | 1.02   | 0.7    |
|                                                            | 0.76  | 0.77   | 0.79   | 0.81   |
| Nucleated red cells (%)                                    | 0.5   | 0.3    | 0.4    | 0.2    |
|                                                            | 0.5   | 0.2    | 0.5    | 0      |
|                                                            | 0.5   | 0.3    | 0.4    | 0      |
|                                                            | 0.4   | 0.3    | 0.3    | 0.2    |
| Nucleated erythrocyte<br>(absolute value) ( $\times 9/L$ ) | 0.02  | 0.01   | 0.01   | 0.01   |
|                                                            | 0.02  | 0.01   | 0.02   | 0      |
|                                                            | 0.01  | 0.01   | 0.02   | 0      |
|                                                            | 0.01  | 0.01   | 0.01   | 0.01   |



**Table S4. Blood cell biochemistry in cynomolgus monkey**

| Animal ID                   |                           | Control group |       | Experimental group |       |
|-----------------------------|---------------------------|---------------|-------|--------------------|-------|
|                             |                           | 1             | 2     | 3                  | 4     |
| White blood cells           | $\times 10^3/\mu\text{L}$ | 11.77         | 10.47 | 13.68              | 20.38 |
| Neutrophils                 | %                         | 42.8          | 57.8  | 49.3               | 59.4  |
|                             | $\times 10^3/\mu\text{L}$ | 5.03          | 6.05  | 6.74               | 12.11 |
| Lymphocyte                  | %                         | 51.8          | 38.2  | 45.8               | 37.4  |
|                             | $\times 10^3/\mu\text{L}$ | 6.09          | 4     | 6.27               | 7.61  |
| Monocyte                    | %                         | 3.1           | 3     | 3.1                | 2.4   |
|                             | $\times 10^3/\mu\text{L}$ | 0.36          | 0.32  | 0.42               | 0.5   |
| Eosinophil                  | %                         | 1.2           | 0.5   | 0.6                | 0.1   |
|                             | $\times 10^3/\mu\text{L}$ | 0.15          | 0.05  | 0.08               | 0.02  |
| Basophil                    | %                         | 0.5           | 0.3   | 0.3                | 0.4   |
|                             | $\times 10^3/\mu\text{L}$ | 0.06          | 0.03  | 0.05               | 0.07  |
| Large unstained cell        | %                         | 0.6           | 0.2   | 0.9                | 0.3   |
|                             | $\times 10^3/\mu\text{L}$ | 0.08          | 0.03  | 0.12               | 0.06  |
| Red blood cells             | $\times 10^6/\mu\text{L}$ | 5.91          | 5.25  | 5.58               | 5.57  |
| Hemoglobin                  | g/dL                      | 14.6          | 12.4  | 13.3               | 14.3  |
| Red blood cell specific     | %                         | 45.8          | 40.4  | 41.8               | 46.5  |
| Mean corpuscular volume     | fL                        | 77.5          | 77    | 74.8               | 83.5  |
| Mean corpuscular hemoglobin | Pg                        | 24.7          | 23.5  | 23.9               | 25.7  |
| Mean corpuscular hemoglobin | g/dL                      | 31.9          | 30.6  | 31.9               | 30.8  |
| Platelet                    | $\times 10^3/\mu\text{L}$ | 357           | 420   | 277                | 417   |
| Red blood cell distribution | %                         | 16.3          | 18.2  | 17.3               | 17.1  |

**Table S5. Blood biochemistry in cynomolgus monkey**

| Animal ID                                     | Control group |       | Experimental group |       |
|-----------------------------------------------|---------------|-------|--------------------|-------|
|                                               | 1             | 2     | 3                  | 4     |
| Glutamic-pyruvic transaminase (U/L)           | 49.4          | 56    | 36.5               | 41.1  |
| Glutamic oxalacetic transaminase(U/L)         | 55.8          | 60    | 60.1               | 60.6  |
| Total protein (g/L)                           | 73.2          | 71.4  | 69.6               | 81.9  |
| Albumin (g/L)                                 | 43.7          | 45.3  | 43.8               | 49.1  |
| Alkaline phosphatase (U/L)                    | 465.7         | 507.4 | 441.5              | 494.3 |
| Total bilirubin ( $\mu\text{mol/L}$ )         | 3.03          | 1.95  | 2.61               | 2.68  |
| Serum total cholesterol ( $\mu\text{mol/L}$ ) | 3.31          | 4.77  | 3.5                | 2.82  |
| Triglyceride ( $\mu\text{mol/L}$ )            | 0.46          | 0.25  | 0.21               | 0.37  |
| Urea ( $\mu\text{mol/L}$ )                    | 9.75          | 8.05  | 6.63               | 7.16  |
| Crea ( $\mu\text{mol/L}$ )                    | 85.3          | 74.9  | 59.8               | 77    |
| Creatine kinase ( $\mu\text{mol/L}$ )         | 289.3         | 259.3 | 238.7              | 422.7 |
| Lactate dehydrogenase (U/L)                   | 386           | 359   | 309                | 303   |
| C-reactive protein (mg/mL)                    | 1.912         | 1.583 | 1.718              | 3.611 |
